# Supplementary material for: Diabetes Mellitus and Vitamin D Deficiency: Comparable Effect on Survival and a Deadly Association after a Myocardial Infarction
Source: MDPI journal article supplement (doi:10.3390/jcm9072127), 2020-07-06
Supplement: s1 [file s1]

**Supplementary Table 1: Cumulative incidence rates of Angina/MI, taking into account death as a competing risk**

| <b>Follow-up</b>          | <b>12<br/>months</b>                    | <b>24<br/>months</b> | <b>48<br/>months</b> | <b>96<br/>months</b> | <b>120<br/>months</b> |
|---------------------------|-----------------------------------------|----------------------|----------------------|----------------------|-----------------------|
| <b>Groups of patients</b> | <b>Angina/MI (%)</b>                    |                      |                      |                      |                       |
| DM & HypovitD             | 11.7                                    | 15.6                 | 20.1                 | 21.9                 | 24.6                  |
| nonDM & HypovitD          | 8.7                                     | 13.8                 | 16                   | 19.9                 | 22.7                  |
| DM & non HypovitD         | 10.3                                    | 11.6                 | 13                   | 18.2                 | 23.6                  |
| Non DM & non HypovitD     | 6.7                                     | 11.1                 | 14.6                 | 16.7                 | 16.7                  |
|                           | <b>Death before Angina/MI event (%)</b> |                      |                      |                      |                       |
| DM & HypovitD             | 13.2                                    | 15.6                 | 19.2                 | 27.5                 | 34.8                  |
| nonDM & HypovitD          | 6                                       | 8.9                  | 13.9                 | 21.2                 | 24.8                  |
| DM & non HypovitD         | 5.1                                     | 7.5                  | 9.7                  | 24.8                 | 30.4                  |
| Non DM & non HypovitD     | 5                                       | 6.4                  | 7.6                  | 17.4                 | 21.6                  |
