# Supplementary material for: Diabetes Mellitus and Vitamin D Deficiency: Comparable Effect on Survival and a Deadly Association after a Myocardial Infarction
Source: MDPI journal article supplement (doi:10.3390/jcm9072127), 2020-07-06
Supplement: s1 [file s1]

**Supplementary Table 2: Cumulative incidence rates of HF, taking into account death as a competing risk**

| <b>Follow-up</b>          | <b>12<br/>months</b>             | <b>24<br/>months</b> | <b>48<br/>months</b> | <b>96<br/>months</b> | <b>120<br/>months</b> |
|---------------------------|----------------------------------|----------------------|----------------------|----------------------|-----------------------|
| <b>Groups of patients</b> | <b>HF (%)</b>                    |                      |                      |                      |                       |
| DM & HypovitD             | 8.1                              | 10.9                 | 16.3                 | 22                   | 22.8                  |
| nonDM & HypovitD          | 6                                | 7.8                  | 9.8                  | 12                   | 12.6                  |
| DM & non HypovitD         | 6                                | 12.1                 | 13.6                 | 16.2                 | 16.2                  |
| Non DM & non HypovitD     | 4.4                              | 5.3                  | 7.1                  | 8.9                  | 9.9                   |
|                           | <b>Death before HF event (%)</b> |                      |                      |                      |                       |
| DM & HypovitD             | 13,3                             | 15,2                 | 20                   | 26,5                 | 33,2                  |
| nonDM & HypovitD          | 5,2                              | 9,1                  | 13,2                 | 22,7                 | 25,6                  |
| DM & non HypovitD         | 6,2                              | 7,4                  | 7,4                  | 19,7                 | 28,8                  |
| Non DM & non HypovitD     | 5,4                              | 6,4                  | 7                    | 15,5                 | 24,3                  |
